# Supplementary material for: Immunogenicity and Protective Efficacy of Psoralen-Inactivated SARS-CoV-2 Vaccine in Nonhuman Primates
Source: MDPI journal article supplement (doi:10.3390/vaccines12050451), 2024-04-24

Western Blot analysis of SARS-CoV-2 PsIV vaccine, after the two-step chromatographic purification using cellulose MAX-DexS-VirS column and a Capto Core 700 column. Presence of SARS-CoV-2 spike glycoprotein (S) was confirmed using anti-spike protein antibody as the primary antibody. Presence of SARS-CoV-2 nucleocapsid protein (N) was confirmed using anti-nucleoprotein protein antibody as the primary antibody.

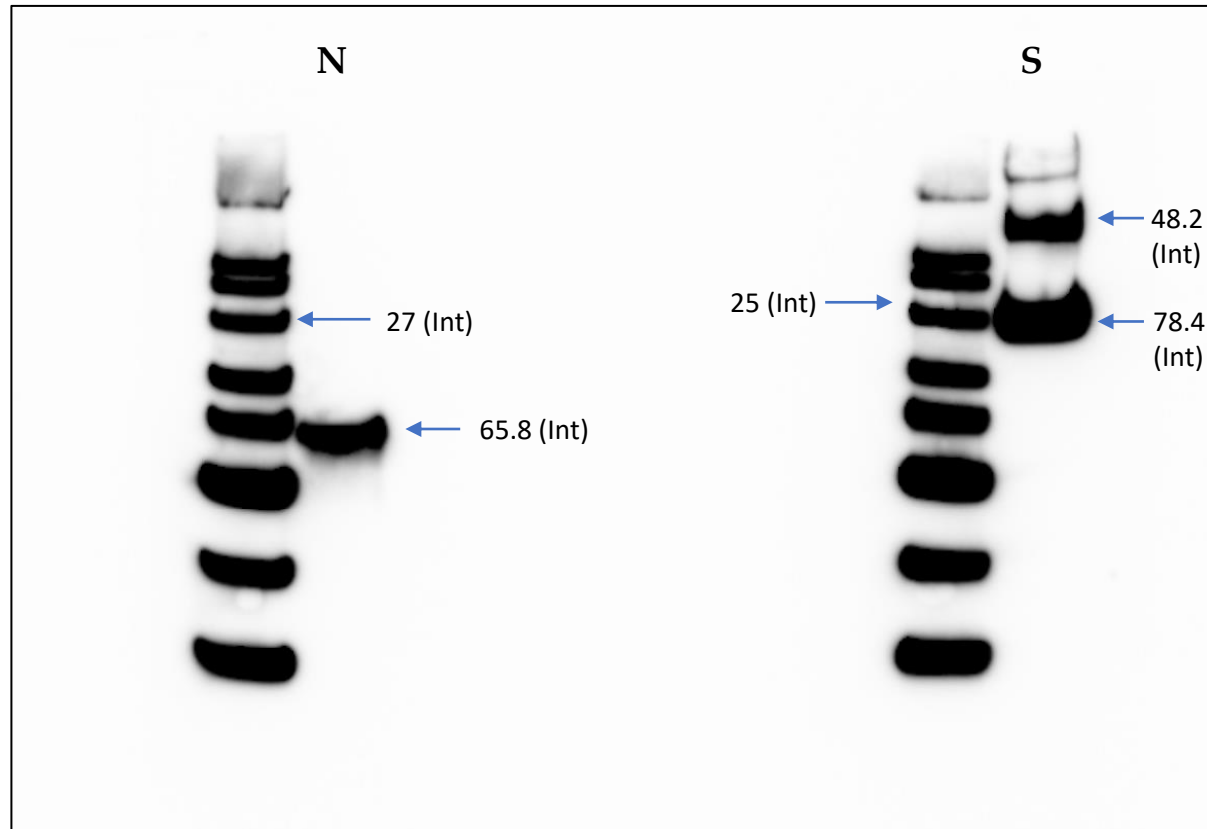

Western Blot analysis of SARS-CoV-2 PsIV vaccine, after the two-step chromatographic purification using cellulose MAX-DexS-VirS column and a Capto Core 700 column. Presence of SARS-CoV-2 membrane protein (M) was confirmed using anti-membrane protein antibody as the primary antibody.

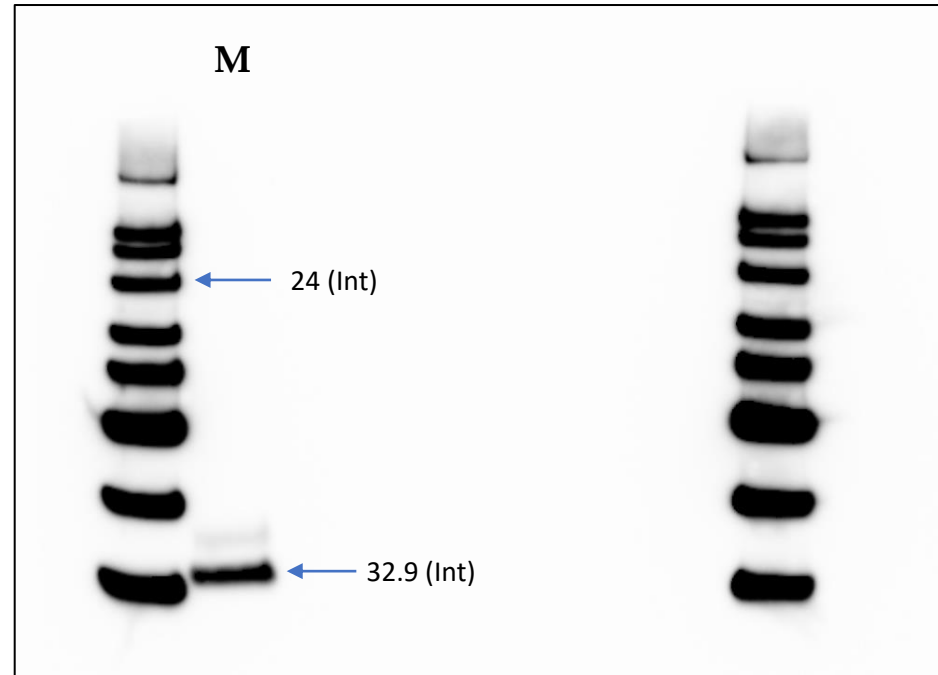

Supplement: s1 [file s1]
